# Supplementary material
Source: publisher site journal article supplement (https://www.dovepress.com/article/575321)
Supplement: Supplementary file 1 [file 575321%20Revised%20Supplementary%20Materials.doc]

**Supplementary Table 1: Basic Clinical Information for Healthy Individuals and Patients with Intervertebral Disc Degeneration**

| IVDD |  |  |  |  |  |
| --- | --- | --- | --- | --- | --- |
| Group | Gender | Years | Lumbar level | Degeneration level | blood |
| 1 | Male | 61 | L4/5 | 3 | 10 ml |
| 2 | Female | 62 | L4/5 | 3 | 10 ml |
| 3 | Male | 60 | L4/5 | 4 | 10 ml |
| 4 | Female | 61 | L4/5 | 4 | 10 ml |
| Healthy |  |  |  |  | 10 ml |
| Group | Gender | Years | Lumbar level | Degeneration level | 10 ml |
| 1 | Male | 59 | L4/5 | 1 | 10 ml |
| 2 | Male | 64 | L4/5 | 0 | 10 ml |
| 3 | Female | 58 | L4/5 | 1 | 10 ml |
| 4 | Female | 38 | L4/5 | 0 | 10 ml |

Supplementary Figure **1:**  Transcriptome data quality control and de-batching analysis: A. PCA downscaling distribution of GSE70362 quality control, B. PCA downscaling distribution of GSE34095 quality control, C. Data intersection histogram of GSE70362 and GSE34095, D. Expression plot before data removal batch for GSE70362 and GSE34095, E. Data removal post-batch expression graphs for GSE70362 and GSE34095, F. Data removal pre-batch expression scatter plots for GSE70362 and GSE34095, G. Data removal post-batch expression scatter plots for GSE70362 and GSE34095.

Supplementary Figure **2:** Single-cell quality control: A. PC count of single-cell data, B. Tissue distribution of single cells, C. Genetic screening criteria of single cells**.**

**
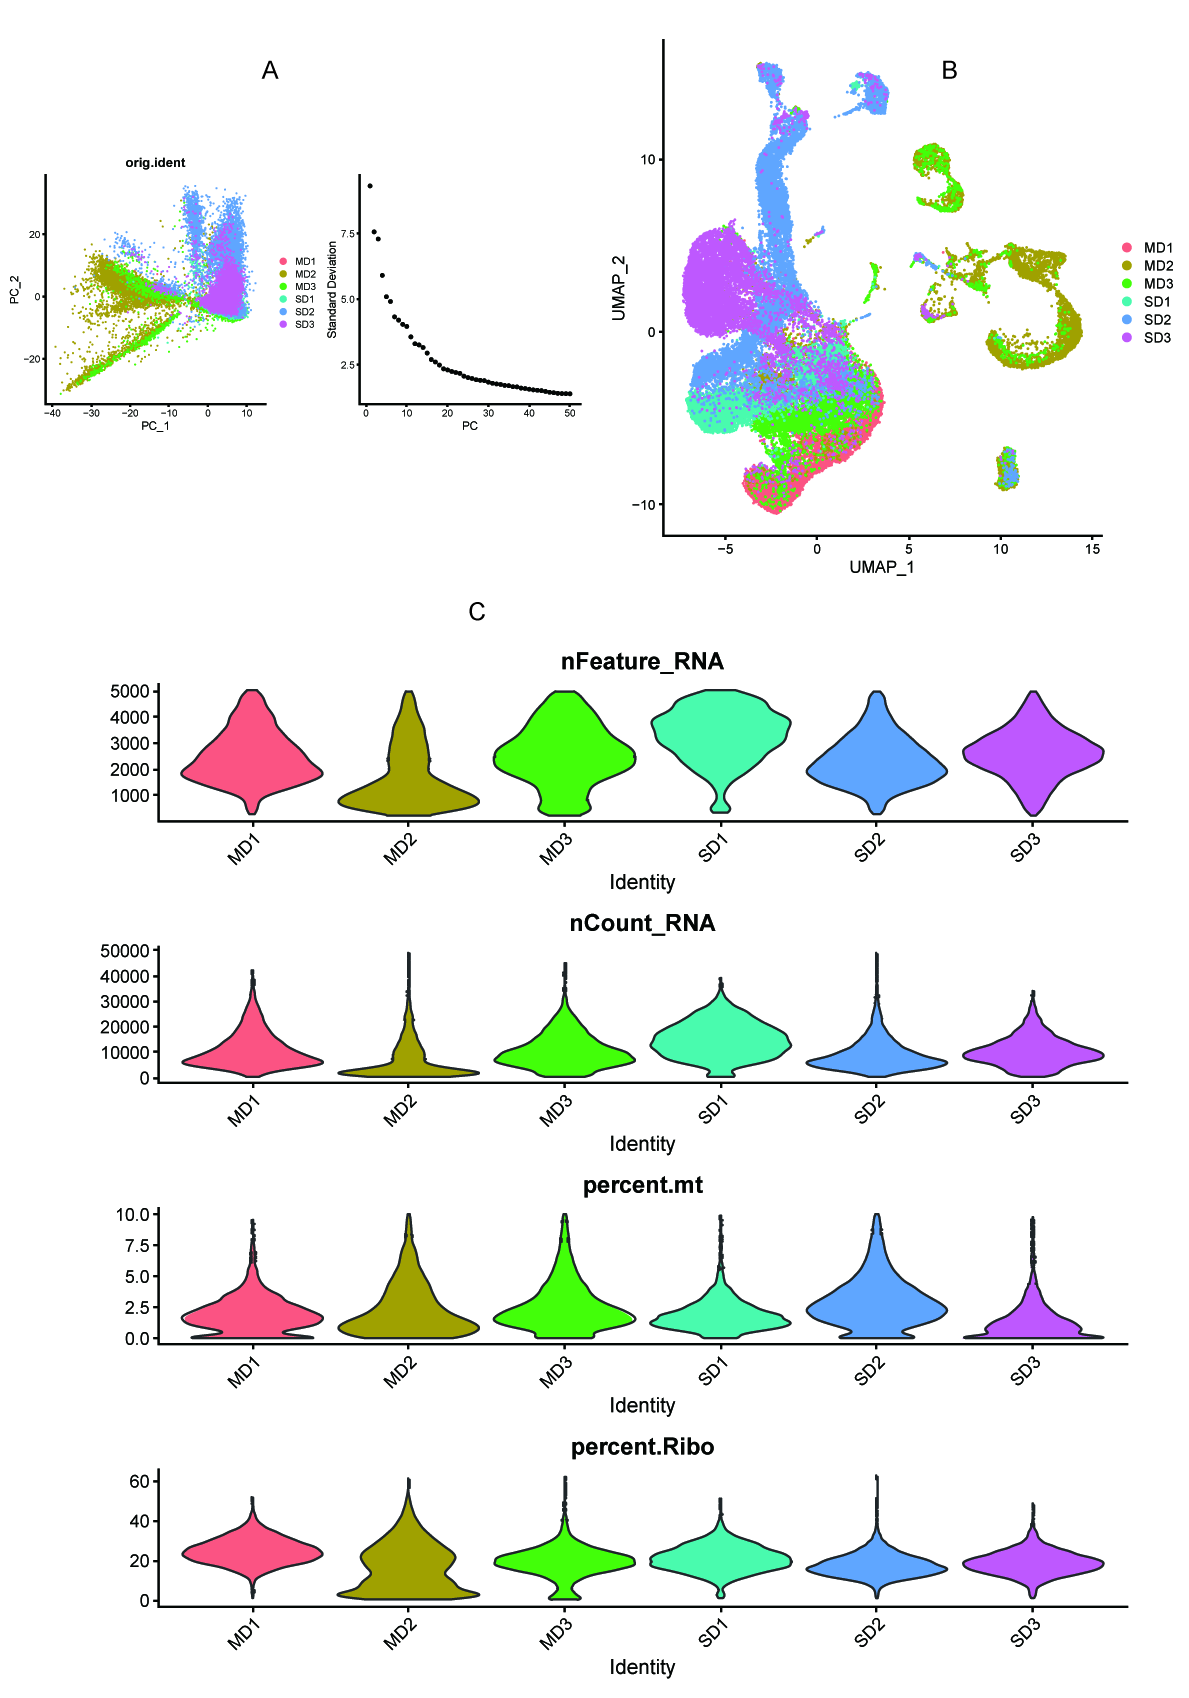
**
